# Supplementary material for: NEDD9 Inhibition by miR-25-5p Activation Is Critically Involved in Co-Treatment of Melatonin- and Pterostilbene-Induced Apoptosis in Colorectal Cancer Cells
Source: MDPI journal article supplement (doi:10.3390/cancers11111684), 2019-10-29

Figure 2

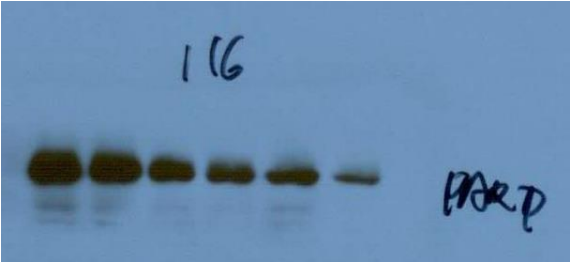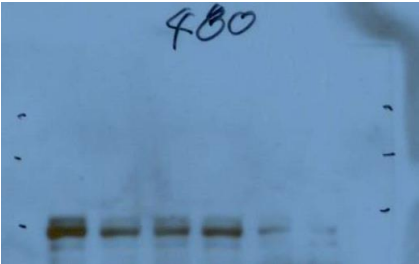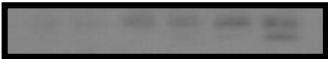

c-cas3 (HT29)

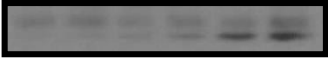

c-cas3 (HCT116)

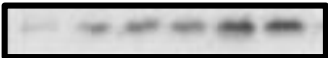

SOX10 (HCT116)

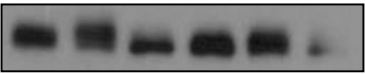

PARP (HT29)

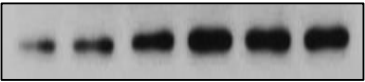

c-PARP (HT29)

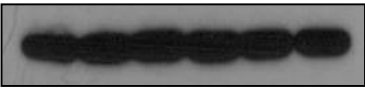

$\beta$ -actin (HT29)

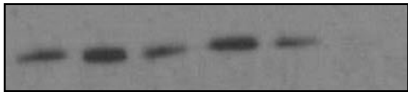

Bcl-xL (HT29)

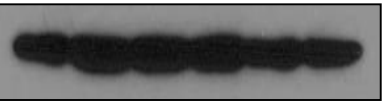

$\beta$ -actin (SW480)

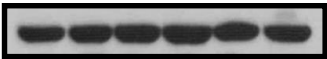

$\beta$ -actin (HCT116)

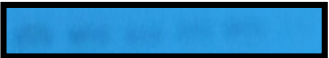

Bcl-xL (SW480)

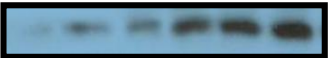

SOX10 (SW480)

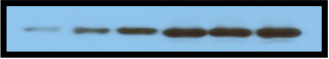

HT29 (SW480)

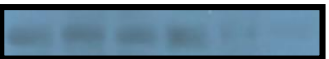

Pro-PARP (SW480)

Figure 3B

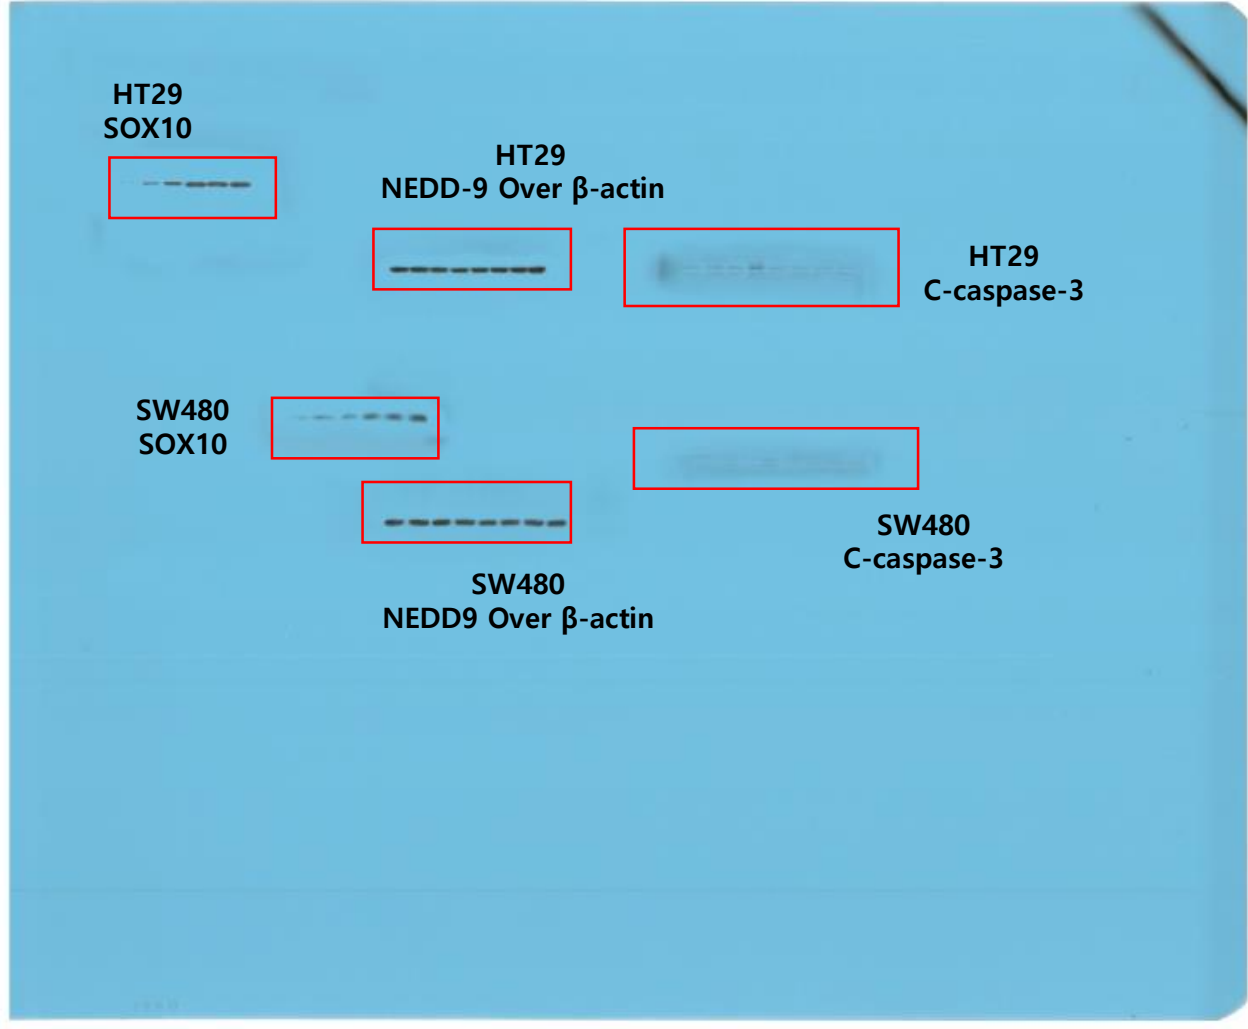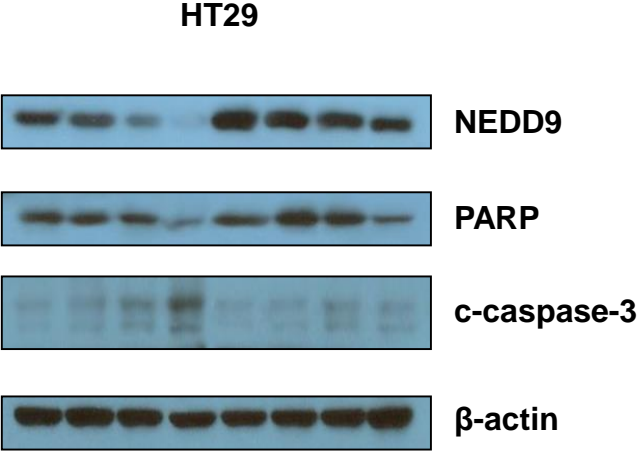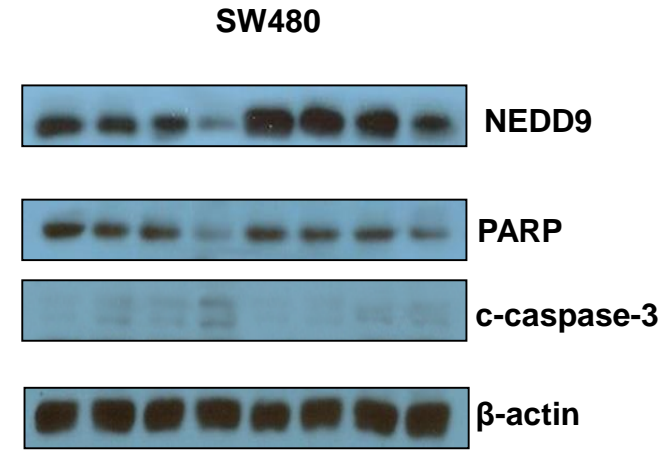

### Figure 7D

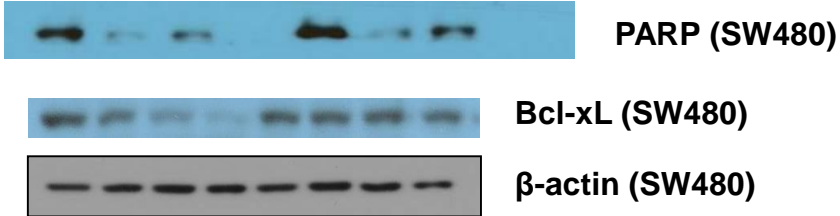

Supplement: s1 [file s1]
