# Supplementary figures and images for: NEDD9 Inhibition by miR-25-5p Activation Is Critically Involved in Co-Treatment of Melatonin- and Pterostilbene-Induced Apoptosis in Colorectal Cancer Cells
Source: MDPI journal article supplement (doi:10.3390/cancers11111684), 2019-10-29

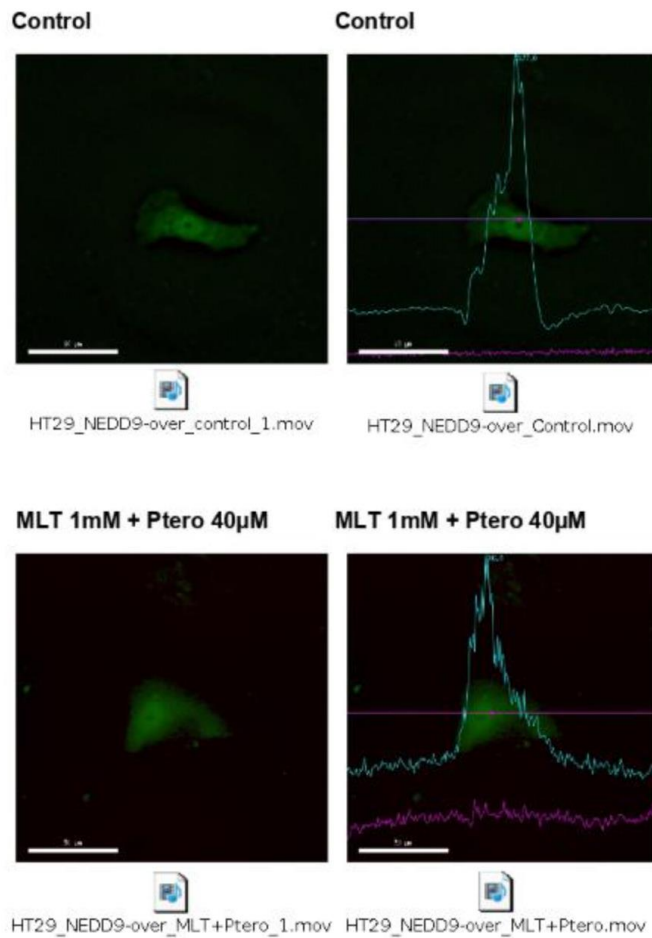

**Figure S1.** movie of HT29 cells (control or MEL+Ptero).

**Commented [M1]:** Should this be “MLT”?

Supplement: s1 [file s1]
